# Supplementary material for: Cross-coupling reaction of aryl diazonium salts with azodicarboxylate using FeCl2
Source: Royal Society of Chemistry journal article supplement (doi:10.1039/c5ra15875c), 2015-01-01

*Supplementary Data*

**Cross-Coupling Reaction of Aryl Diazonium Salts with Azodicarboxylate Using FeCl<sub>2</sub>**

M, Khalaj<sup>a</sup> and M. Ghazanfarpour-Darjani<sup>a</sup>

**<sup>1</sup>H & <sup>13</sup>C-NMR spectra**

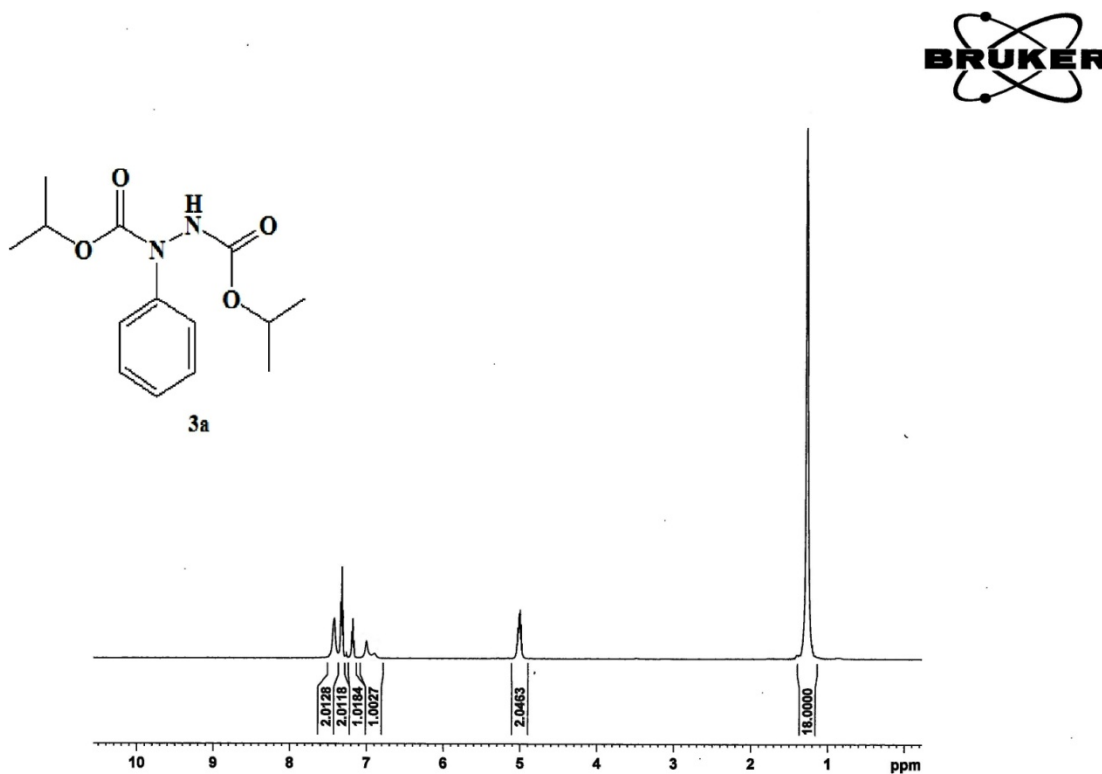

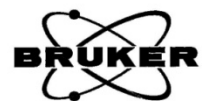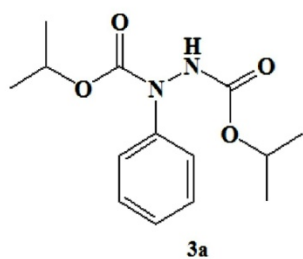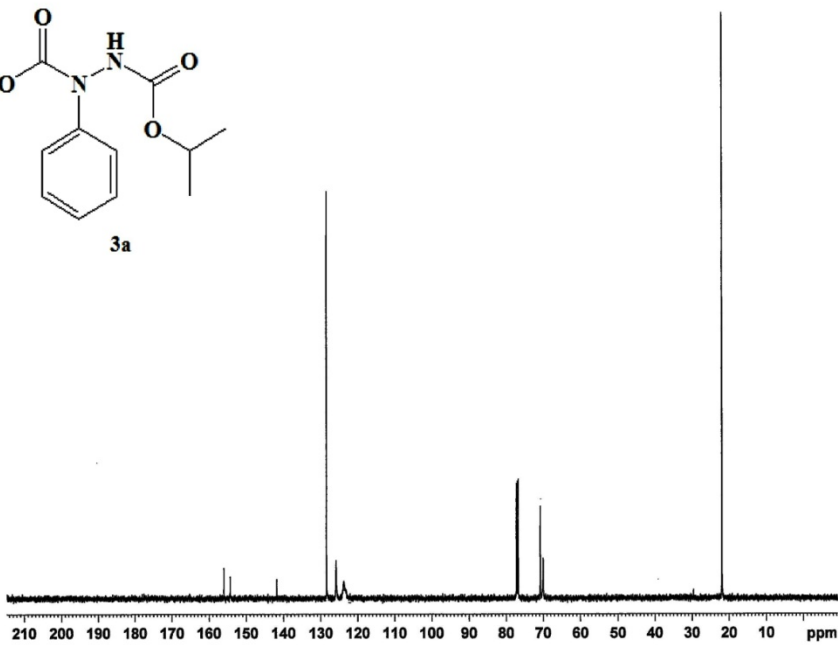

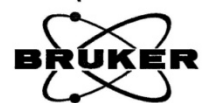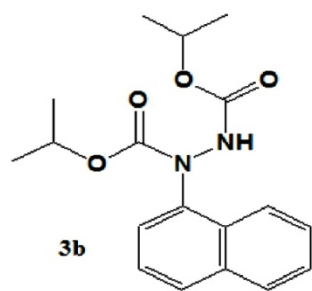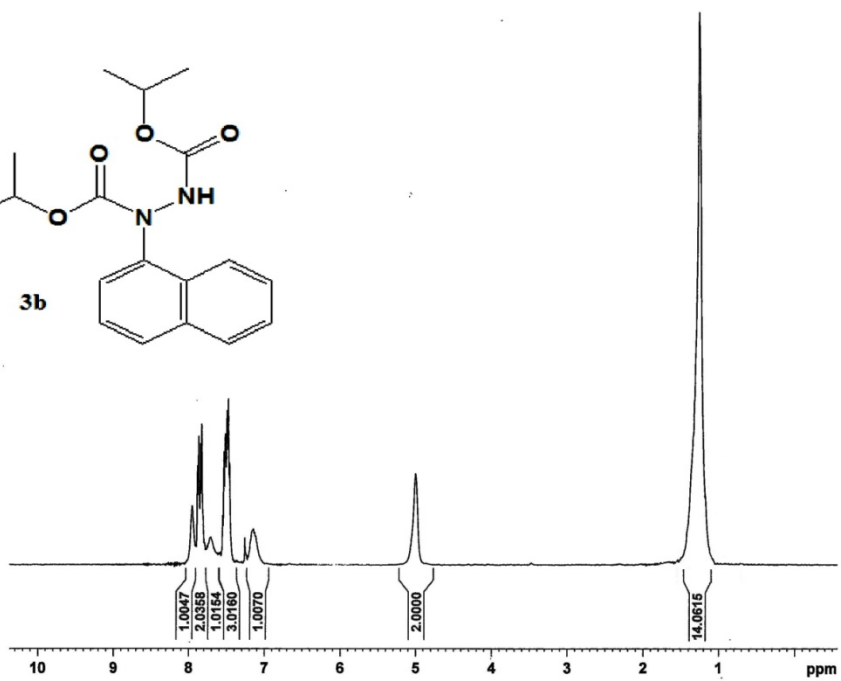

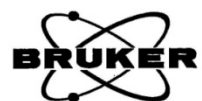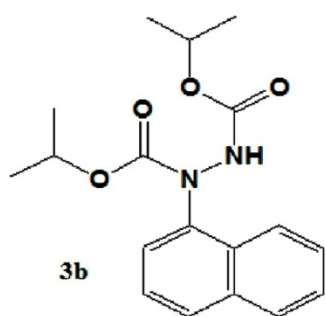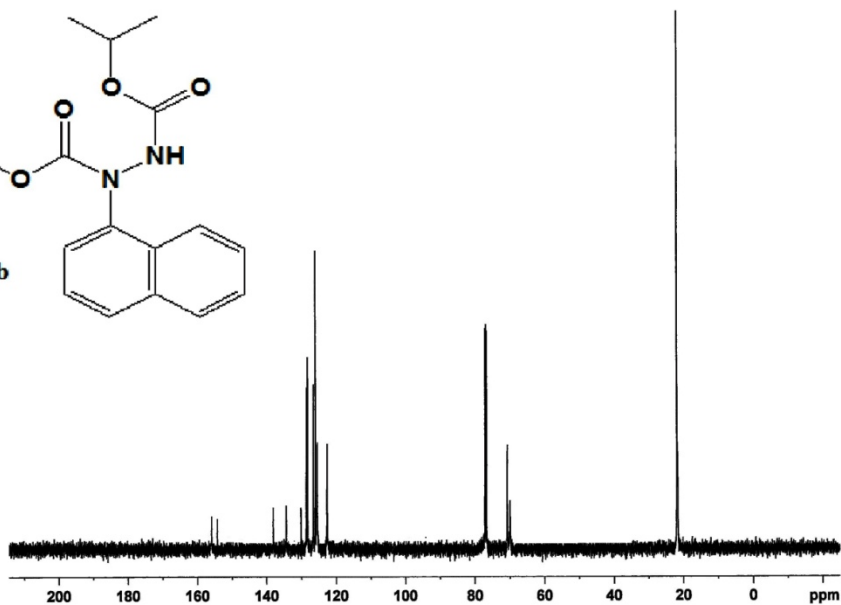

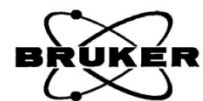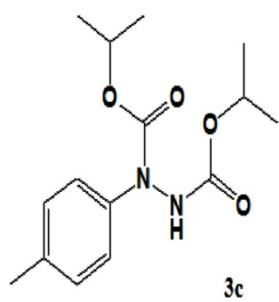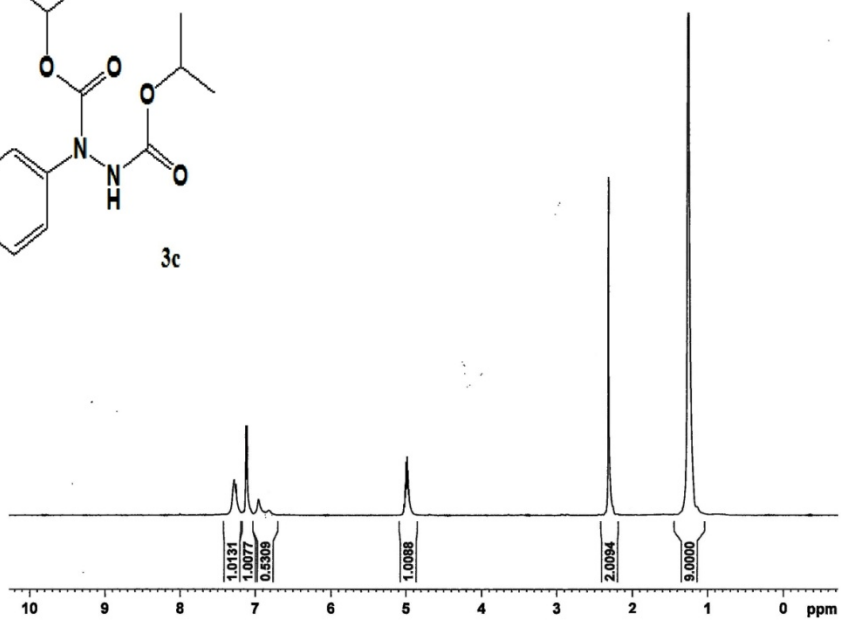

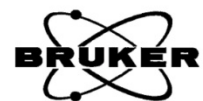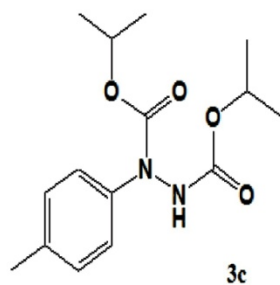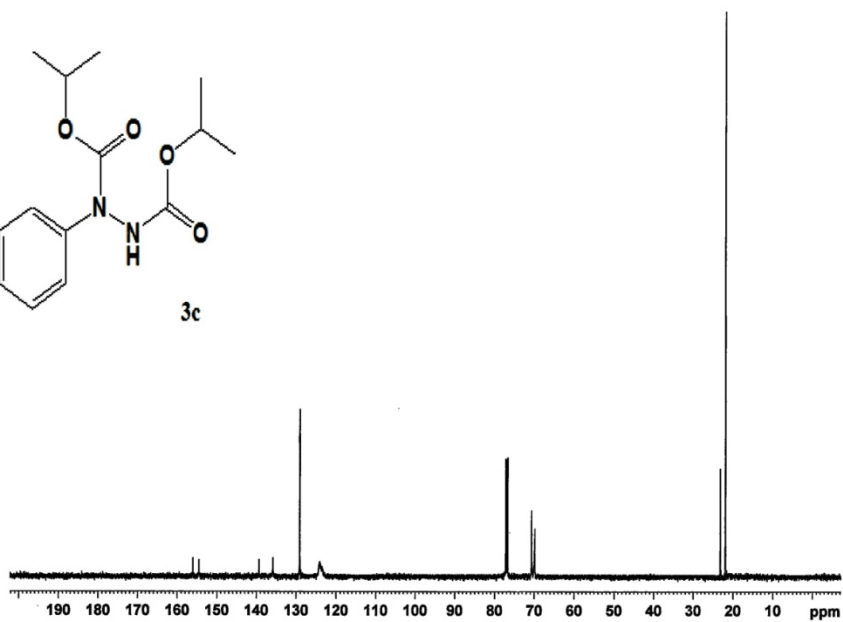

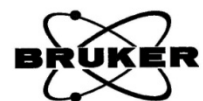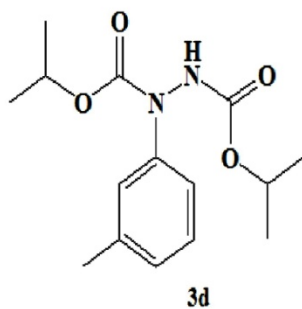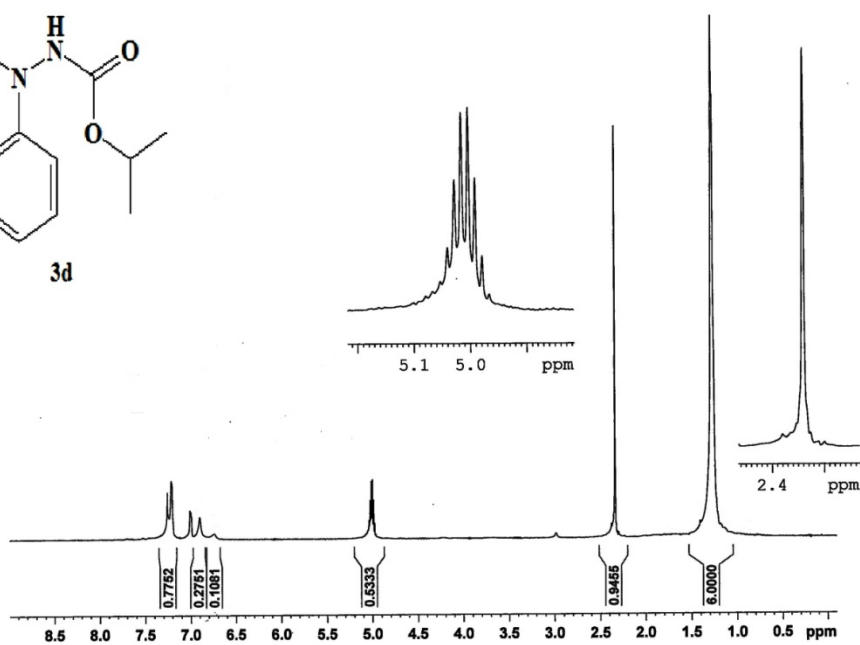

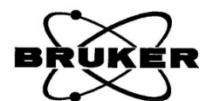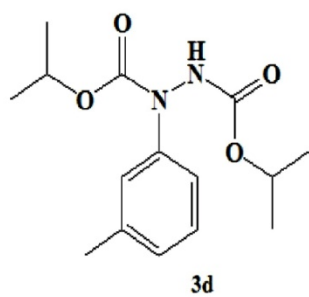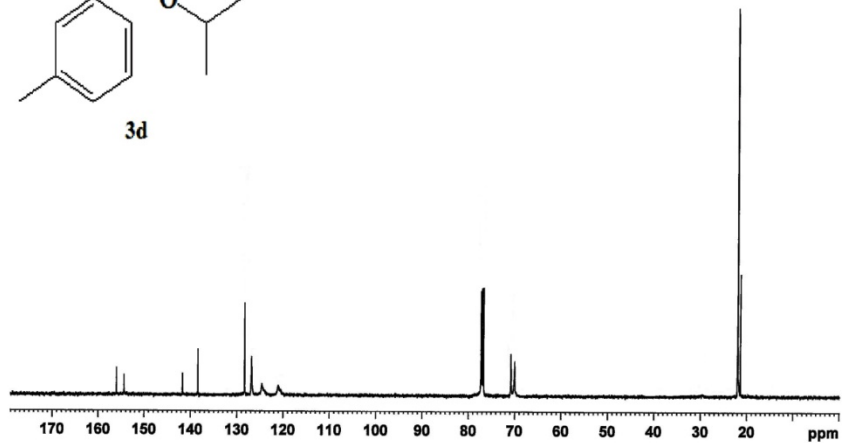



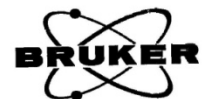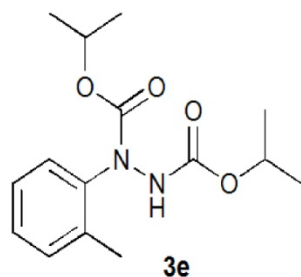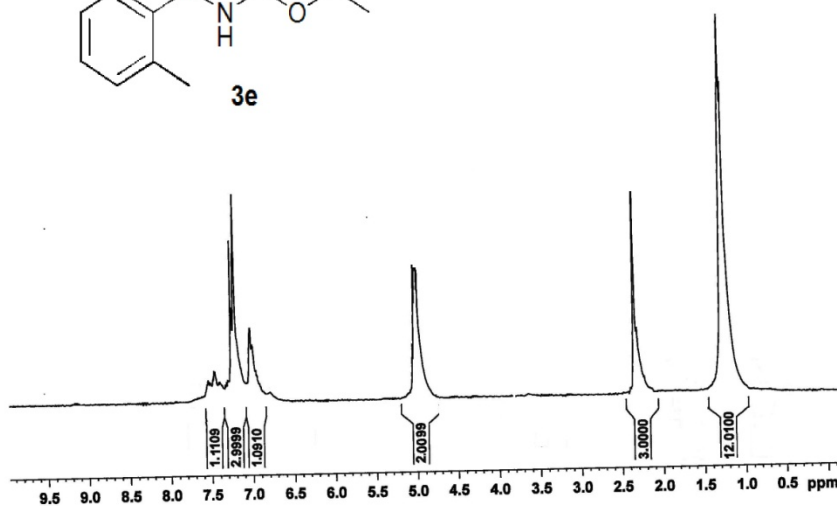

F2 - Acquisition Parameters  
Date\_ 20141124  
Time 23.10  
INSTRUM spect  
PROBHD 5 mm Multispec1  
PULPROG zg  
TD 32768  
SOLVENT CDCl3  
NS 8  
DS 0  
SWE 10330.578 Hz  
FIDRES 0.315264 Hz  
AQ 1.5860696 sec  
RG 71.8  
WE 48.400 usec  
DE 6.00 usec  
TE 300.0 K  
D1 6.00000000 sec  
TD0 1

CHANNEL f1  
NUC1 1H  
P1 15.00 usec  
PL1 1.00 dB  
SFO1 500.1330885 MHz

F2 - Processing parameters  
SI 32768  
SF 500.1330098 MHz  
WDW EM  
SSB 0  
LB 0.30 Hz  
GB 0  
PC 1.00

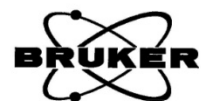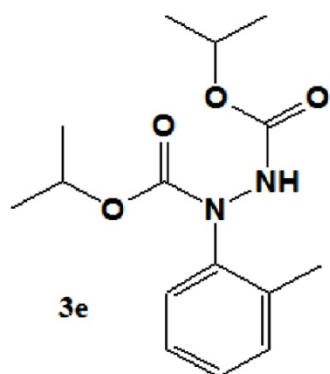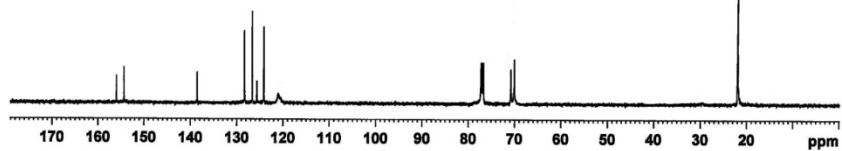

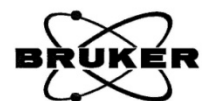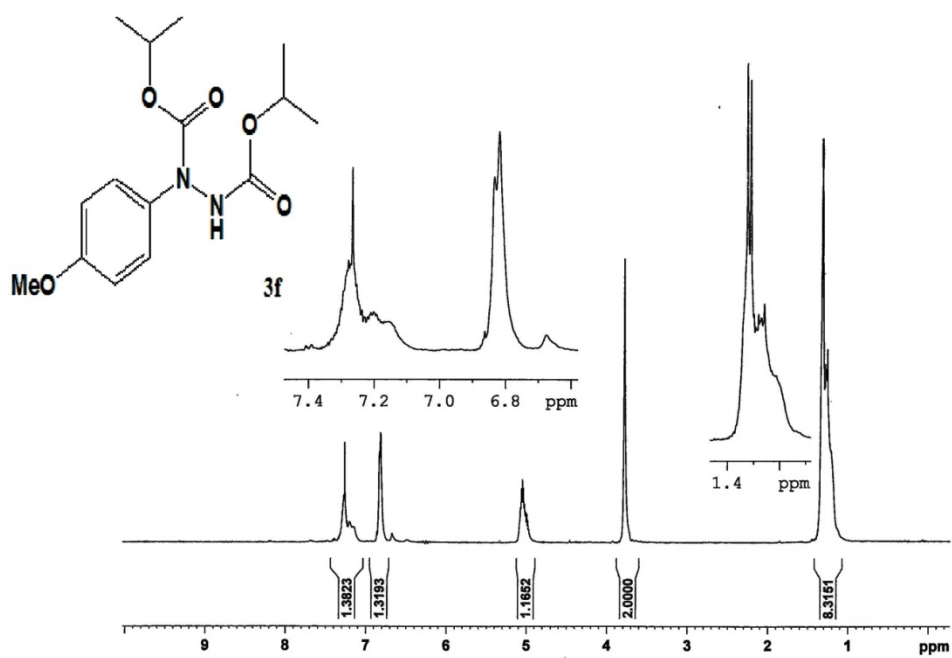

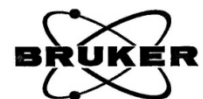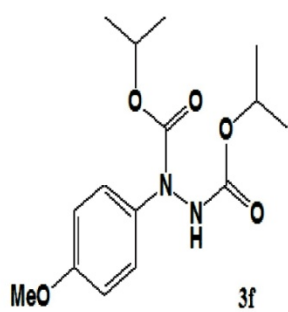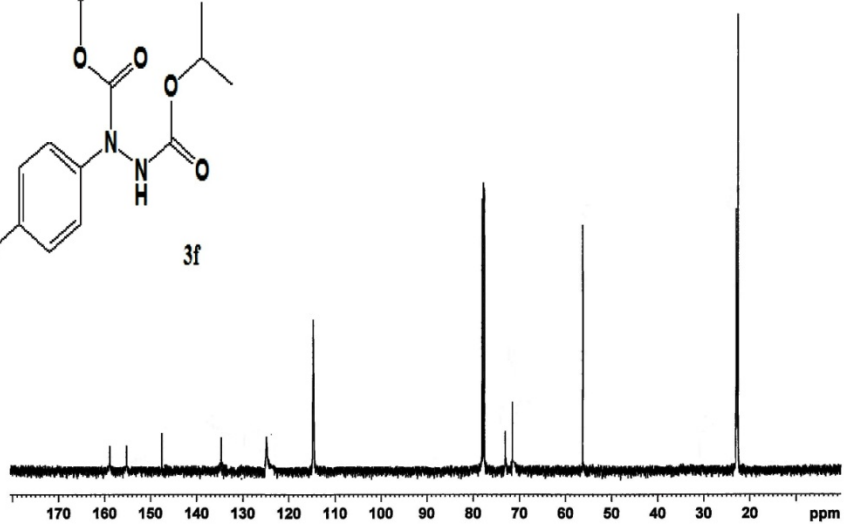

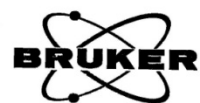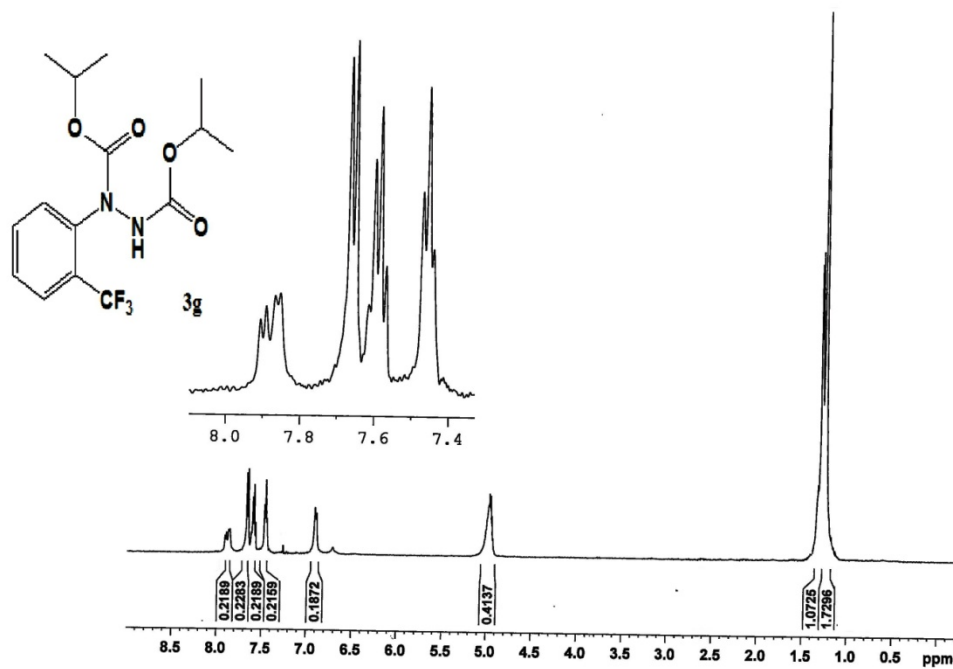

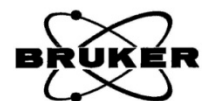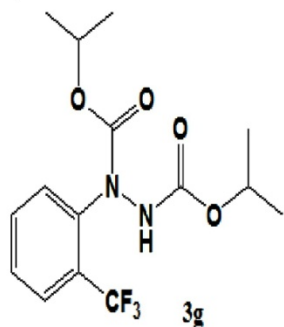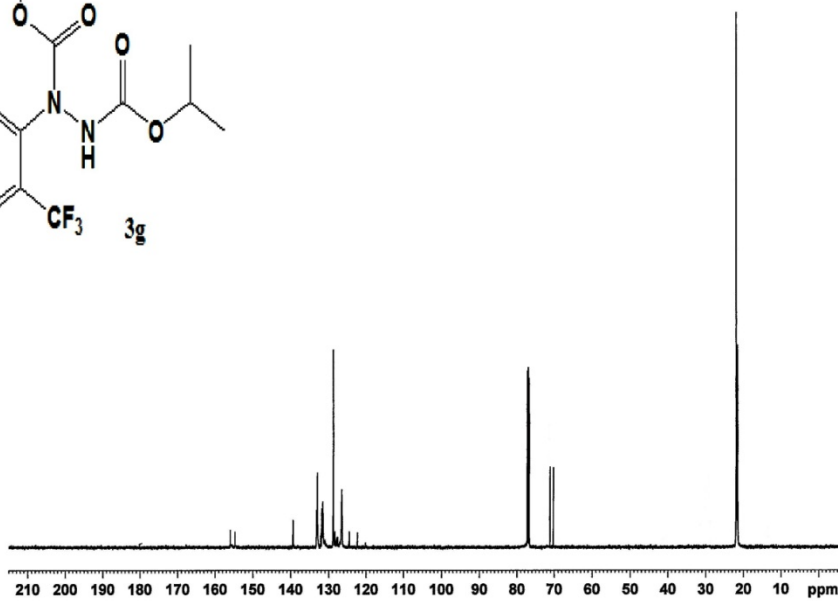

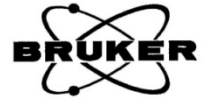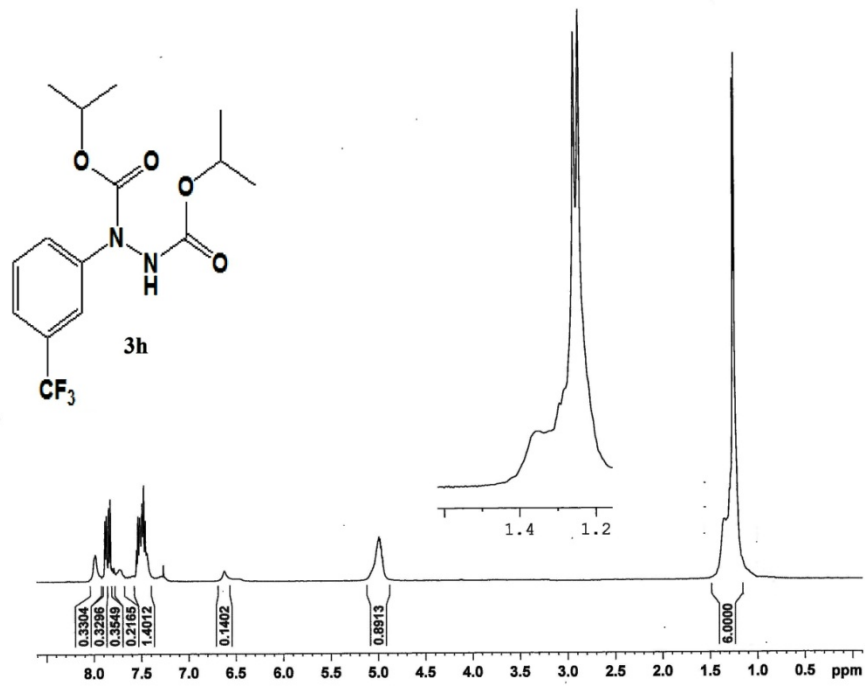

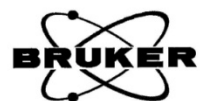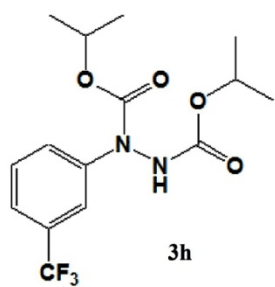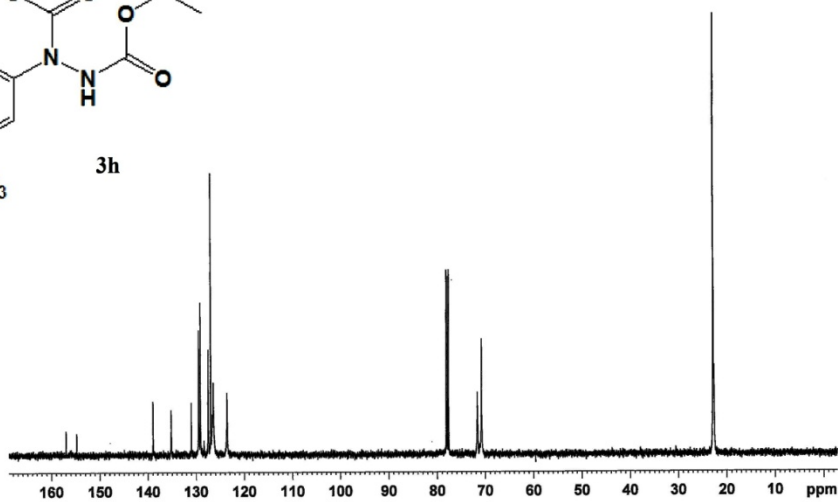



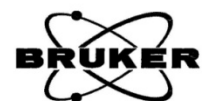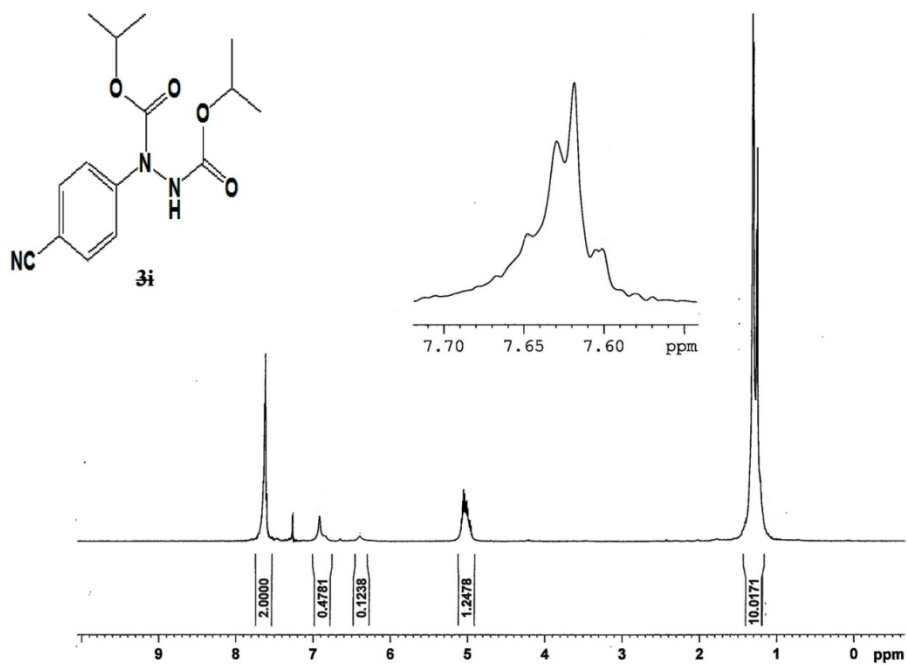

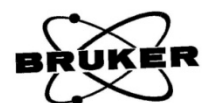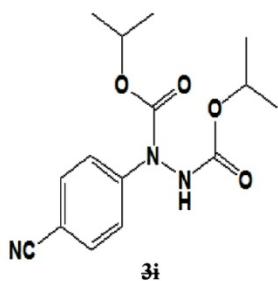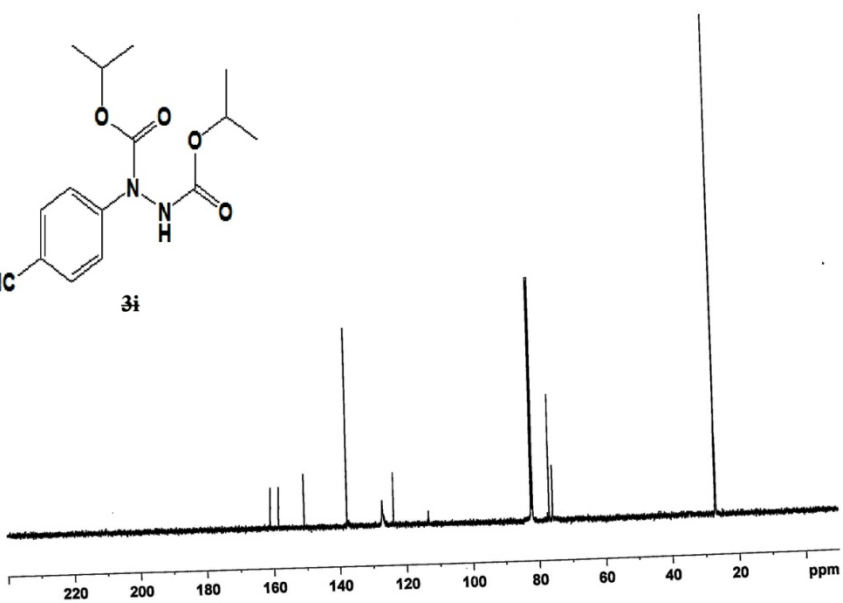

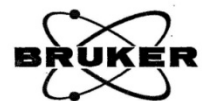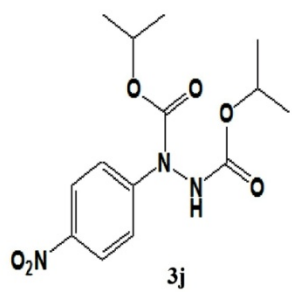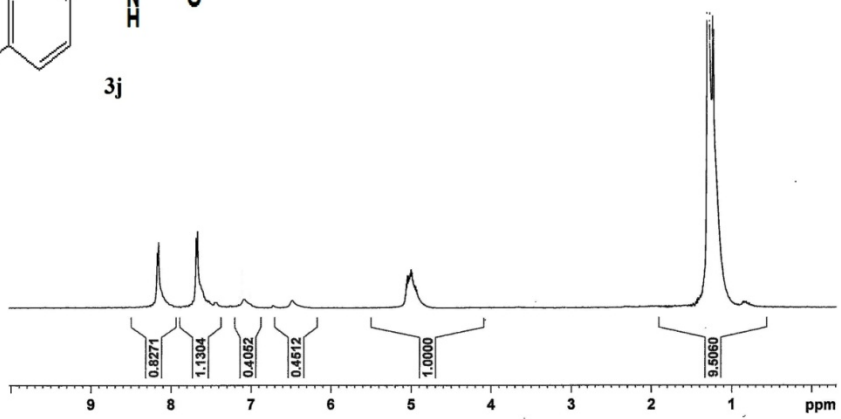

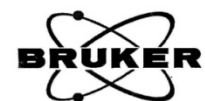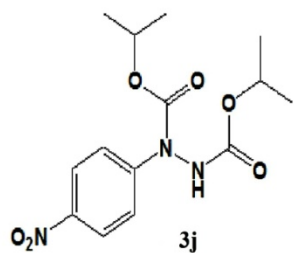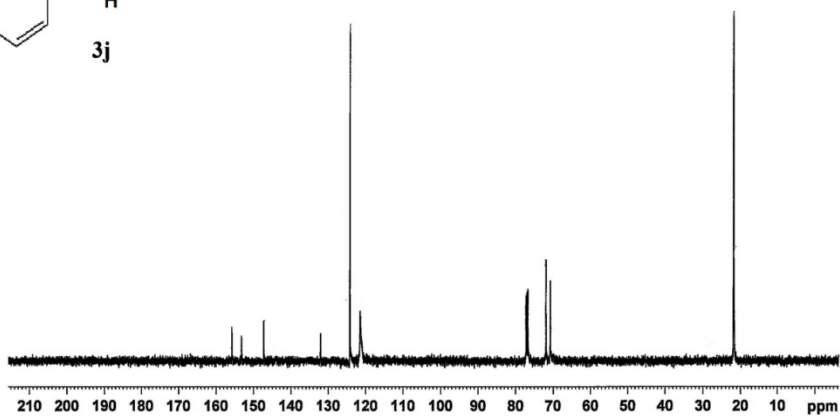

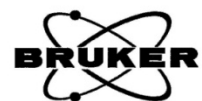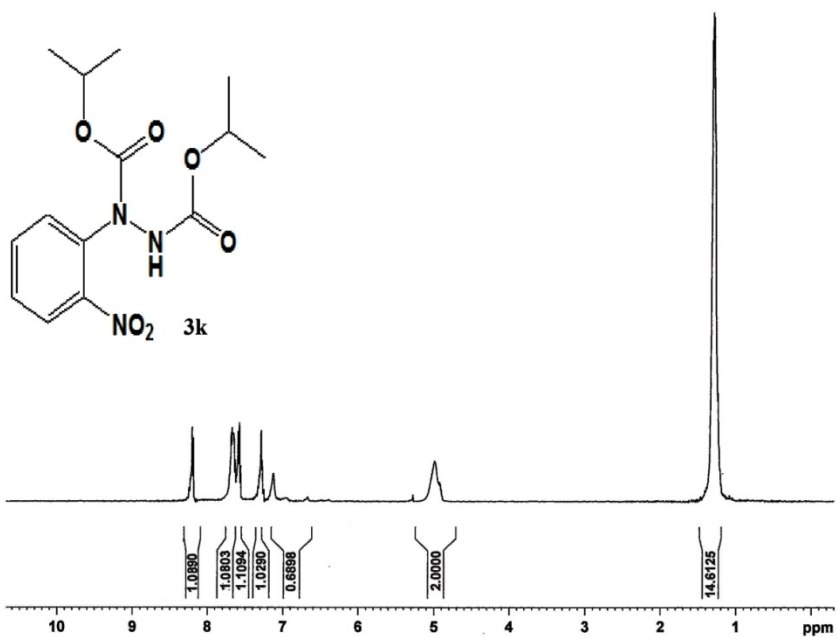

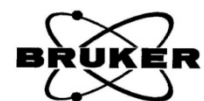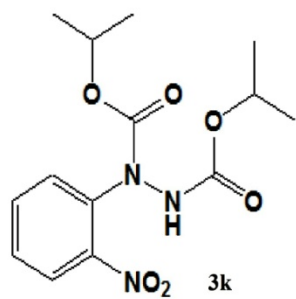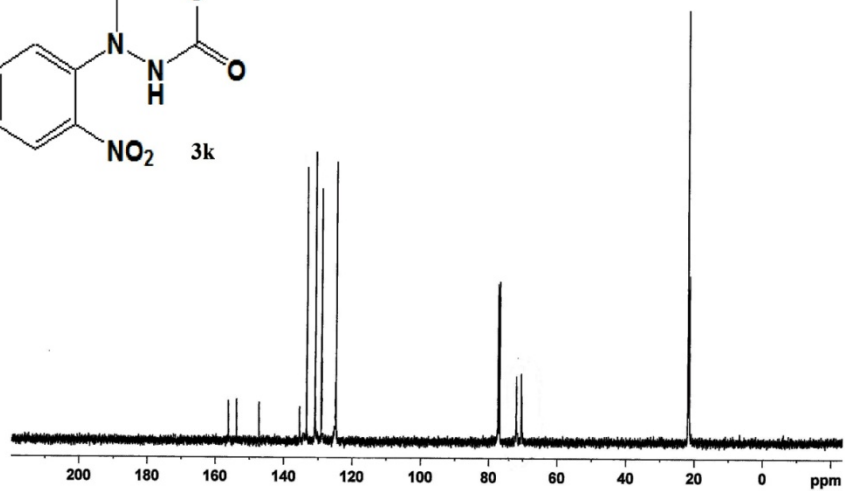

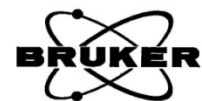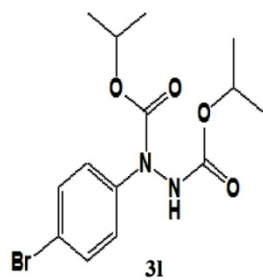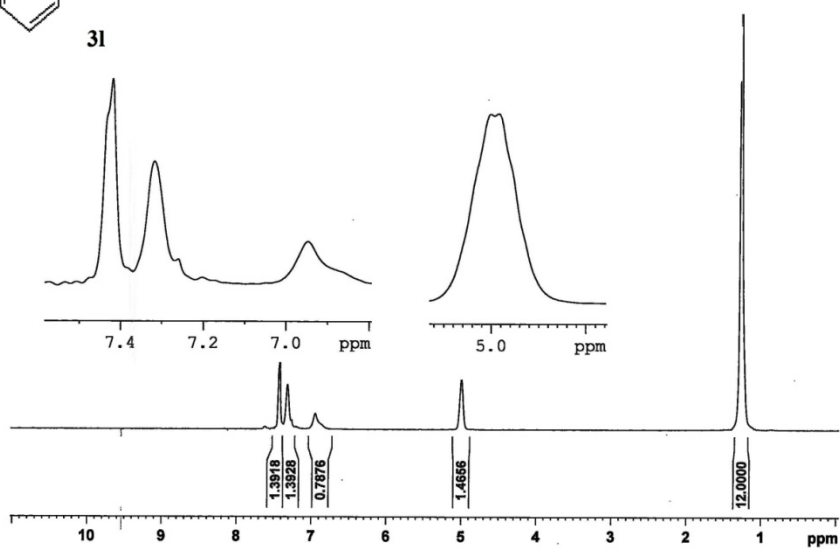

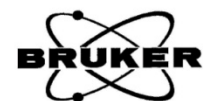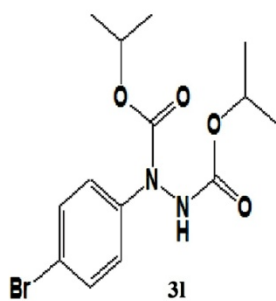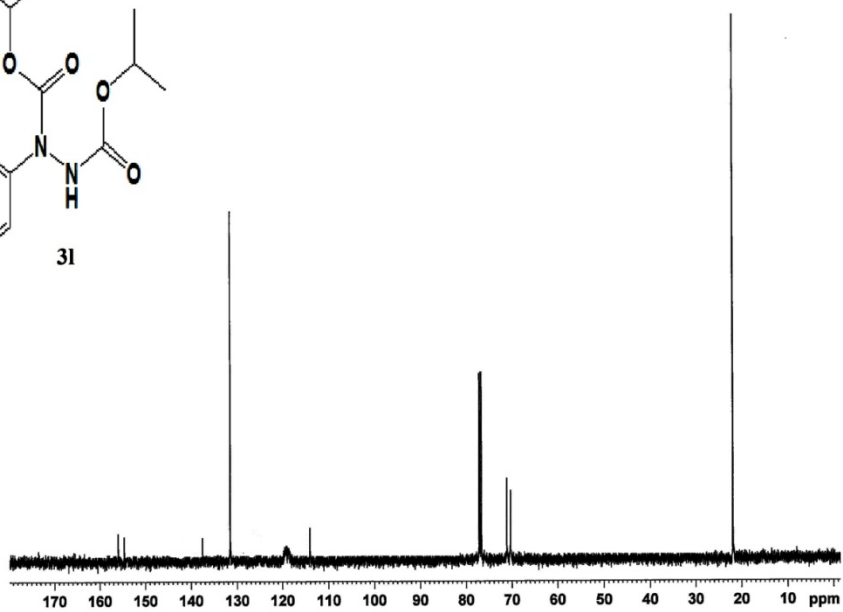



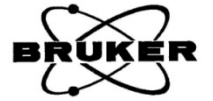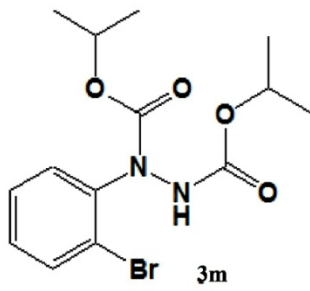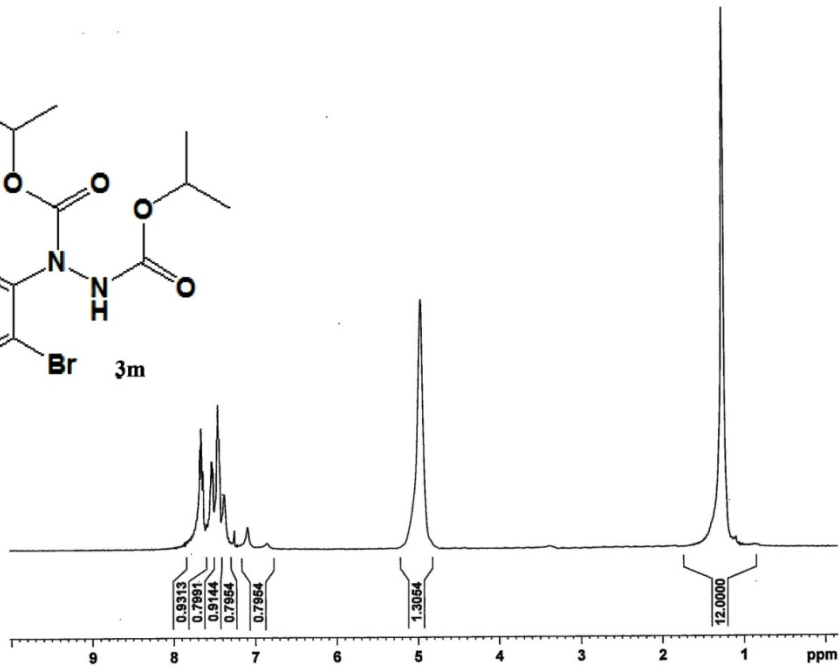

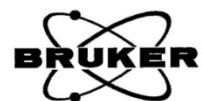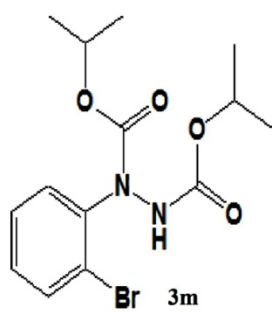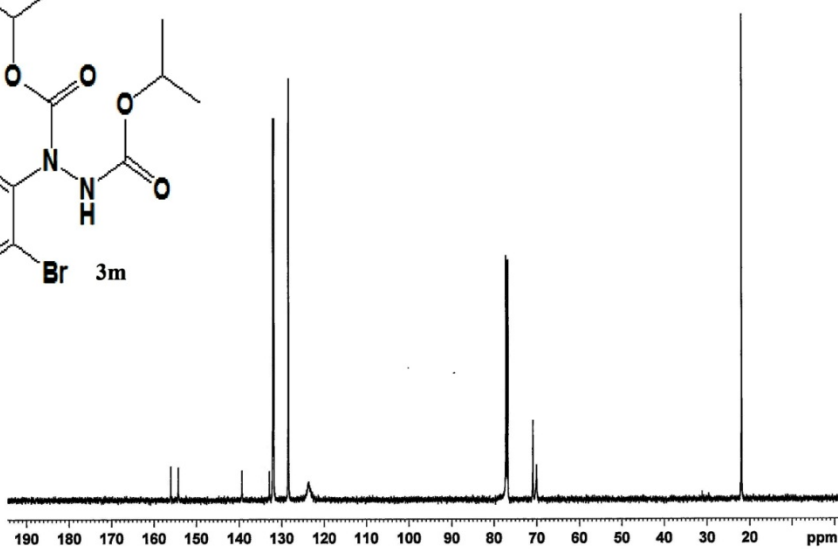

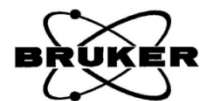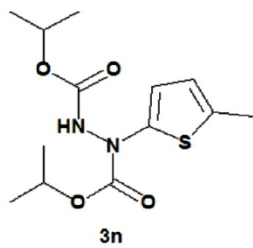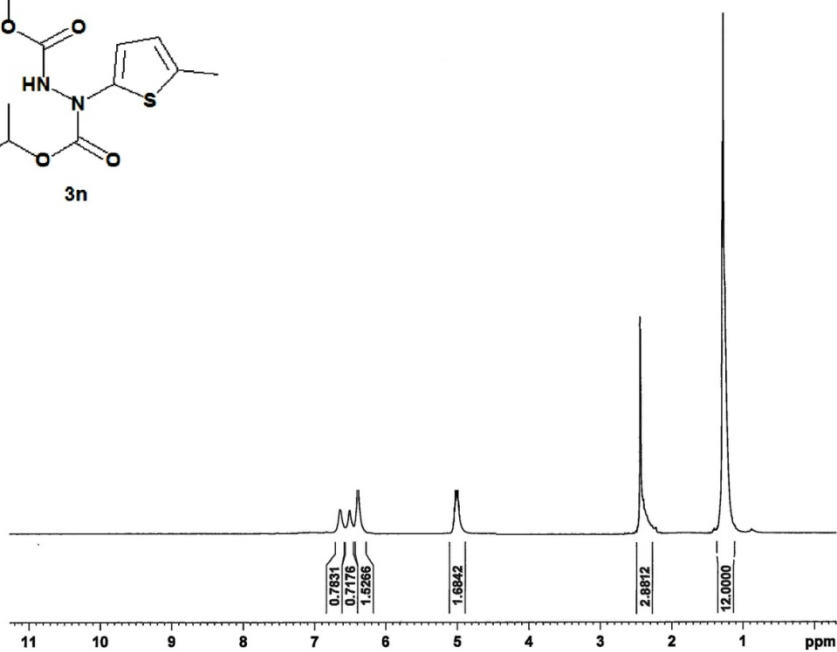

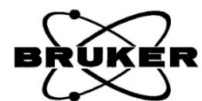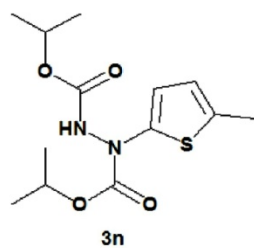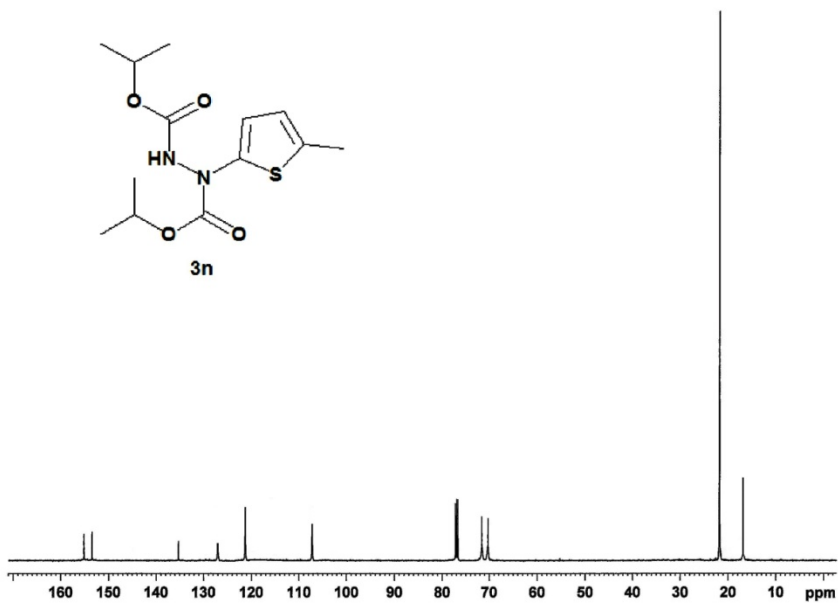

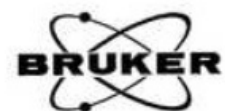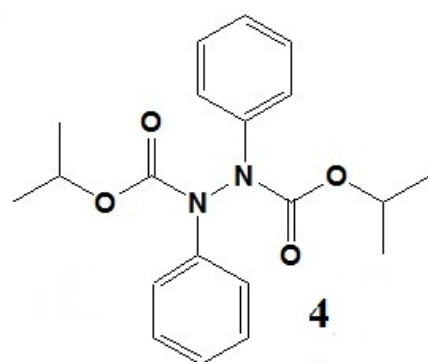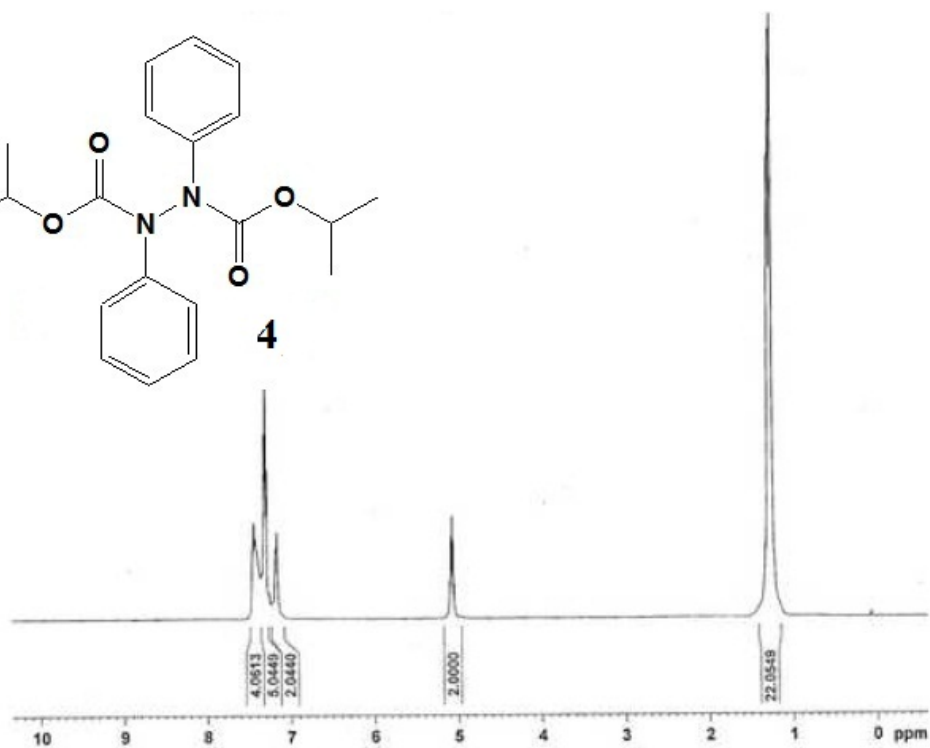

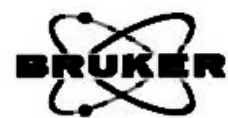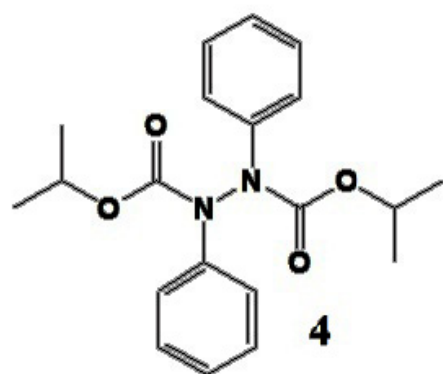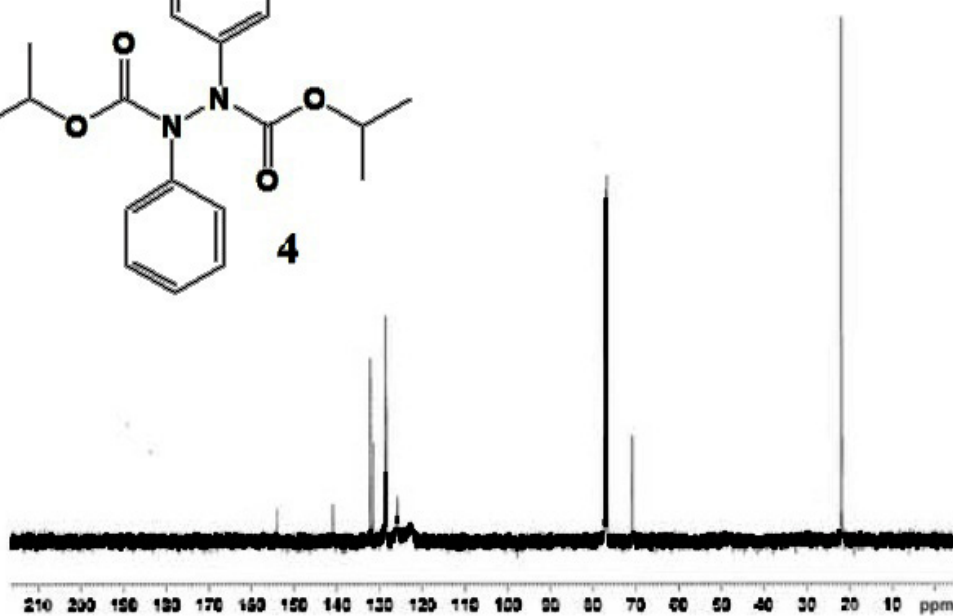

Supplement: c5ra15875c1.pdf [file c5ra15875c1.pdf]
